# Supplementary material for: Amorphous Ti(iv)-modified Bi2WO6 with enhanced photocatalytic performance
Source: Royal Society of Chemistry journal article supplement (doi:10.1039/c6ra10616a), 2016-01-01
Supplement: c6ra10616a1.pdf [file c6ra10616a1.pdf]

## Supporting Information

# Amorphous Ti(IV)-modified Bi<sub>2</sub>WO<sub>6</sub> with enhanced photocatalytic performance

Ying Xu,<sup>a</sup> Jia Song,<sup>a</sup> Feng Chen,<sup>a,\*</sup> Xuefei Wang, Huogen Yu,<sup>a,b,\*</sup> Jiaguo Yu<sup>c</sup>

<sup>1</sup> State Key Laboratory of Silicate Materials for Architectures, Wuhan University of Technology, Wuhan 430070, People's Republic of China

<sup>2</sup> School of Chemistry, Chemical Engineering and Life Sciences, Wuhan University of Technology, Wuhan 430070, People's Republic of China.

<sup>3</sup>State Key Laboratory of Advanced Technology for Material Synthesis and Processing, Wuhan University of Technology, Wuhan 430070, People's Republic of China

Tel: 0086-27-87756662, Fax: 0086-27-87879468

E-mail: fchen@whut.edu.cn (F. Chen), yuhuogen@whut.edu.cn

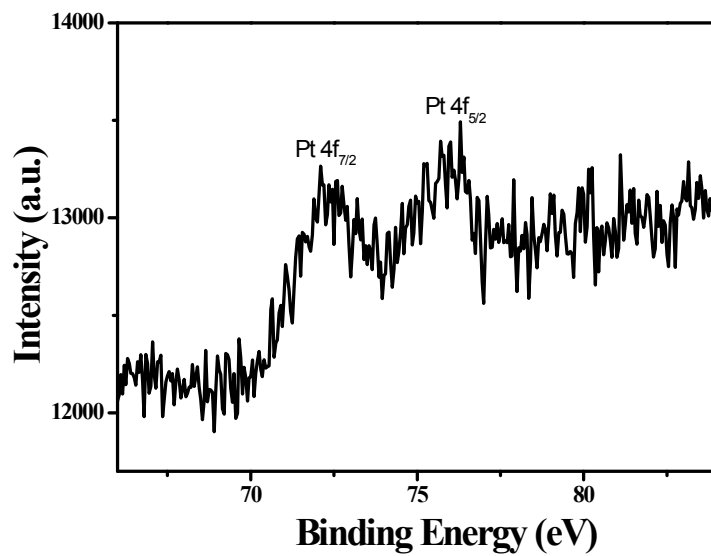

Fig. S1 The high-resolution XPS spectra of Pt 4f for Ti(IV)-Pt/Bi<sub>2</sub>WO<sub>6</sub> (5 wt%).

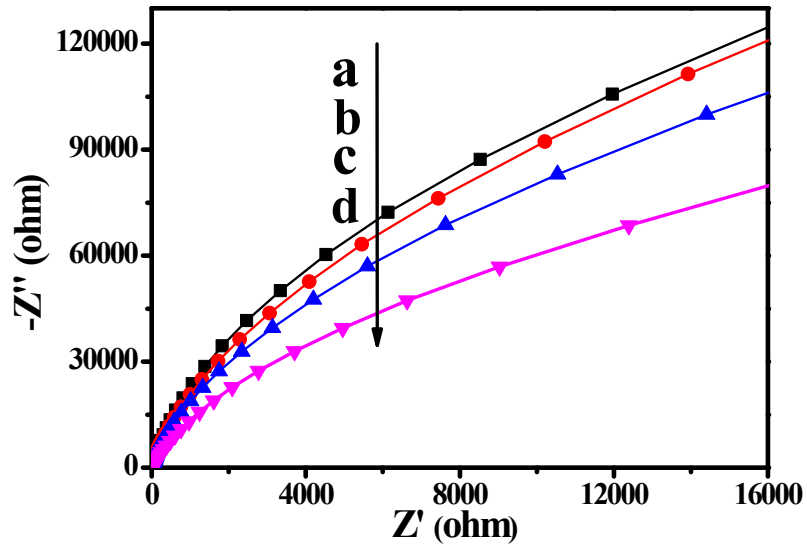

Fig. S2 Electrochemical impedance spectra for various samples: (a)  $\text{Bi}_2\text{WO}_6$ ; (b)  $\text{Ti(IV)/Bi}_2\text{WO}_6$  (5 wt%); (c)  $\text{Pt/Bi}_2\text{WO}_6$ ; (d)  $\text{Ti(IV)-Pt/Bi}_2\text{WO}_6$  (5 wt%).
